# Ancient Divergence in the Trans-Oceanic Deep-Sea Shark *Centroscymnus crepidater*

Regina L. Cunha<sup>1\*</sup>, Ilaria Coscia<sup>2</sup>, Celine Madeira<sup>1</sup>, Stefano Mariani<sup>3</sup>, Sergio Stefanni<sup>4</sup>, Rita Castilho<sup>1</sup>

**1** CCMAR-CIMAR, Universidade do Algarve, Faro, Portugal, **2** Institute of Biological, Environmental and Rural Sciences (IBERS), Aberystwyth University, Aberystwyth, Ceredigion, United Kingdom, **3** School of Environment and Life Sciences, University of Salford, Manchester, United Kingdom, **4** IMAR / DOP, Department of Oceanography and Fisheries, University of the Azores, Horta, Azores, Portugal

## Abstract

Unravelling the genetic structure and phylogeographic patterns of deep-sea sharks is particularly challenging given the inherent difficulty in obtaining samples. The deep-sea shark *Centroscymnus crepidater* is a medium-sized benthopelagic species that exhibits a circumglobal distribution occurring both in the Atlantic and Indo-Pacific Oceans. Contrary to the wealth of phylogeographic studies focused on coastal sharks, the genetic structure of bathyal species remains largely unexplored. We used a fragment of the mitochondrial DNA control region, and microsatellite data, to examine genetic structure in *C. crepidater* collected from the Atlantic Ocean, Tasman Sea, and southern Pacific Ocean (Chatham Rise). Two deeply divergent (3.1%) mtDNA clades were recovered, with one clade including both Atlantic and Pacific specimens, and the other composed of Atlantic samples with a single specimen from the Pacific (Chatham Rise). Bayesian analyses estimated this splitting in the Miocene at about 15 million years ago. The ancestral *C. crepidater* lineage was probably widely distributed in the Atlantic and Indo-Pacific Oceans. The oceanic cooling observed during the Miocene due to an Antarctic glaciation and the Tethys closure caused changes in environmental conditions that presumably restricted gene flow between basins. Fluctuations in food resources in the Southern Ocean might have promoted the dispersal of *C. crepidater* throughout the northern Atlantic where habitat conditions were more suitable during the Miocene. The significant genetic structure revealed by microsatellite data suggests the existence of present-day barriers to gene flow between the Atlantic and Pacific populations most likely due to the influence of the Agulhas Current retroflexion on prey movements.

**Citation:** Cunha RL, Coscia I, Madeira C, Mariani S, Stefanni S, et al. (2012) Ancient Divergence in the Trans-Oceanic Deep-Sea Shark *Centroscymnus crepidater*. PLoS ONE 7(11): e49196. doi:10.1371/journal.pone.0049196

**Editor:** Michael Hofreiter, University of York, United Kingdom

**Received:** March 2, 2012; **Accepted:** October 4, 2012; **Published:** November 8, 2012

**Copyright:** © 2012 Cunha et al. This is an open-access article distributed under the terms of the Creative Commons Attribution License, which permits unrestricted use, distribution, and reproduction in any medium, provided the original author and source are credited.

**Funding:** This work was funded by DEECON "Unravelling population connectivity for sustainable fisheries in the Deep Sea" project approved by the European Science Foundation (ESF) under the EUROCORES programme (proposal No 06-EuroDEEP-FP-008 and SFRH-EuroDEEP/0002/2007). R.L.C. was supported by a Postdoctoral fellowship (SFRH/BPD/33613 2009) funded by Foundation for Science and Technology, Portugal (FCT). S.S. is a researcher contracted by IMAR/DOP under the 'Ciência 2007' recruitment program funded by FCT. The funders had no role in study design, data collection and analysis, decision to publish, or preparation of the manuscript.

**Competing Interests:** The authors have declared that no competing interests exist.

\* E-mail: rcunha@ualg.pt

## Introduction

The paucity of data on deep-sea sharks due to the intrinsic difficulty in obtaining samples, have hampered our understanding of the genetic structure of the species inhabiting these remote environments. Nevertheless, a number of expectations based on the prior knowledge of this group of species can be formulated. Dispersal in elasmobranchs is mostly determined by the swimming ability of juveniles and adults, as they have no pelagic larvae. Vagility increases with body size and tends to be higher in pelagic or benthopelagic oceanic species, whereas benthic and coastal species often exhibit low dispersal abilities [1].

Large oceanic elasmobranchs are expected to exhibit low levels of genetic differentiation across vast stretches of the open ocean whereas smaller benthic species may display stronger genetic differentiation. While there is a relatively large number of phylogeographic studies focused on coastal sharks [2,3,4,5], the patterns of genetic structure of deep-sea species remain virtually unknown (but see [6] for a recent study on the population structure of a deep-water squaloid shark).

An increasing number of studies in elasmobranchs reported genetic discontinuities within ocean basins, revealing the existence

of barriers to gene flow [7,8]. Most of these genetic breaks were shaped by female philopatry (return to natal sites to breed [9,10,11]) or vicariant events [12].

Paleoceanographic changes including the opening and closure of corridors connecting marine basins triggered major climate fluctuations as well as faunal turnover. There is increasing evidence that Tethys final closure at 14 myr [13,14] promoted splitting events between Atlantic and Indo-Pacific lineages in several groups of elasmobranchs as described in scalloped hammerhead sharks [15] or in angel sharks [12].

The long-nosed velvet dogfish *Centroscymnus crepidater* (Barbosa du Bocage & de Brito Capello, 1864) is a deep-sea shark with an estimated age of 20 years for female maturity [16]. It occurs in depths ranging from 650 to 1650 m (bathyal) [1] and is thought to be unlikely to undertake inter-oceanic migrations via long-range active dispersal, in the way that oceanic pelagic species do. Nevertheless, *C. crepidater* exhibits a worldwide distribution occurring on the continental and insular slopes of the eastern Atlantic (Iceland to southern Africa), Indian Ocean (Aldabra Islands and India) and Pacific (northern Chile, New Zealand, and southern Australia) [17]. There is no information regarding

migration routes that could shed some light on contemporary levels of gene flow; thus, it is difficult to speculate as to whether its broad distribution is a remnant of ancient vicariance or is sustained by some degree of recent gene flow, possibly following a stepping-stone model [18].

*C. crepidater* belongs to the family Somniosidae, which the paleontological record dates back to the Campanian [83.5–70.6 myr] [19,20]. The only fossils shark teeth unambiguously assigned to the genus *Centroscyllium* are from the Iseyama Formation, central Japan [21] of the Middle Miocene [16.4–11.2 myr]. Given that the fossil record of the genus *Centroscyllium* dates back to the Middle Miocene, and considering its broad distribution with populations occurring both in the Atlantic and Indo-Pacific basins, this tectonic event might have shaped the genetic structure of this species.

Here, we used an 868 bp-fragment of the mitochondrial DNA (mtDNA) control region (CR) to analyse genetic structure in *C. crepidater* collected in the Atlantic and southern Pacific Oceans. We further explore phylogenetic patterns using a portion of the mtDNA cytochrome oxidase subunit I (COI) gene. Genetic diversity and connectivity between Atlantic and Pacific populations was examined with seven microsatellite loci. The combined use of mtDNA and microsatellite data allows inferring past evolutionary events [22] as well as present-day gene flow [23,24]. Mitochondrial data were also used to determine if genetic structure in *C. crepidater* reflects any female philopatric behaviour, and to explore if the Tethys closure triggered lineage-splitting events within this species. Given that mtDNA is maternally inherited, it would allow assessing female philopatry. As a result of the Tethys vicariant event, the predicted phylogenetic pattern would be a sister-clade relationship between lineages from the eastern Atlantic and Indo-West Pacific basins [25,26].

## Results

### Genetic Diversity and Population Structure of *C. crepidater*

**Mitochondrial data.** Sequencing 868 bp of the mtDNA CR from 92 individuals (GenBank accession numbers: JQ360863–JQ360954) of *C. crepidater* (Atlantic: 66 specimens; Pacific: 26 specimens) yielded a total of 70 variable sites and 45 haplotypes (Fig. 1). Additionally, the 655-bp fragment of the cytochrome oxidase subunit I (COI) mtDNA gene yielded total of 61 variable and 11 parsimony-informative sites. We used two mtDNA markers to assess if the reconstructed phylogenetic patterns were congruent. All phylogenetic analyses were performed separately for each gene. The CR ( $-\ln L = -2407.44$ ) and COI ( $-\ln L = 1239.12$ ) ML trees showed two deep-divergent clades (Material S1 and S2, respectively).

The haplotype network based on CR sequence data also shows two well-defined clades (hereafter clades I and II) separated by 24 mutational steps (Fig. 2). Clade I included a larger number of diverse individuals ( $N = 80$ ; 41 haplotypes,  $h = 0.886 \pm 0.029$  and  $\pi = 0.0037 \pm 0.00038$  (Table 1). Clade II with fewer individuals ( $N = 12$ ; 4 haplotypes) showed lower haplotype and nucleotide diversities ( $h = 0.455 \pm 0.170$ ,  $\pi = 0.00098 \pm 0.00049$ ). Corrected net sequence divergence between clades I and II is  $3.1\% \pm 0.61\%$ , with an average sequence divergence (overall mean) between individuals of  $1.0\% \pm 0.17\%$ . The pairwise estimates of  $D$  were only significant between the Azores and the Tasman Sea. Between sites, no pairwise  $\Phi_{st}$  were significant (Fig. 3). The individuals from each clade are equally distributed between ocean basins ( $p = 0.168$ , two-tailed Fisher's exact test).

Results of AMOVA between the two oceans (Atlantic and Pacific) using mtDNA sequence data indicate absence of genetic structure, with most of the variation allocated within sites (Table 2).

Mismatch analysis for all the CR mtDNA sequences displays a bimodal distribution with two well-separated peaks (Fig. 4A). The first peak (closer to the origin) represents variation among individuals of each clade whereas the second, with greater differences among haplotypes, represents comparisons between the two. The non-unimodal distribution of pairwise nucleotide differences (Fig. 4B) suggests that clade I is in equilibrium, and a sudden-population-expansion model can be rejected ( $SSD = 0.097$ ;  $P < 0.001$ ).

**Microsatellite data.** A total of 160 individuals of *C. crepidater* from seven Atlantic and two Pacific locations were genotyped for seven microsatellite loci. Gene diversity varied between 0.233 to 0.829 (mean = 0.485) and the total number of alleles per locus varied between 3 to 11 (mean = 7.4) (Table 3). The plots of the distribution of allele frequencies did not show any striking difference within Atlantic locations but showed a few low frequency different alleles between Atlantic and Pacific locations (Material S3). According to LOSITAN, only locus Ccrep13 was a candidate for balancing selection. Deviation from Hardy–Weinberg equilibrium was found at six locus-by-population combinations out of a total of 49 combinations. There was a heterozygote excess for locus Ccre34 for MAR, ROC, ROS, AZO and a heterozygote deficit in locus Ccre02 for AZO and CHA (see Table 1 for sampling site acronyms). When all loci were taken into account, overall deviation was equivocal, with statistically significant  $G_{is}$  after correction ( $P < 0.001$ ) and non-significant  $F_{is}$  ( $P > 0.132$ ). If only neutral loci were taken into account both values were not significant after correction ( $G_{is}$ ,  $P > 1.000$ ,  $F_{is}$ ,  $P > 0.118$ ).

The analytical approaches to detect genetic structure were congruent in returning absence of structure within the Atlantic samples but significant differentiation between Atlantic and Pacific. Visual inspection of the scatterplots of the first two principal components of discriminant analysis (representing 29.4% and 8.9%) (Fig. 5) showed that the first axis separates mostly the Atlantic from the Pacific. Atlantic samples form a tighter cluster than the Pacific samples, with the second axis slightly setting apart the Chatham Rise. The percentage of Atlantic individuals correctly assigned to their location of origin was lower than 46%. Pacific individuals were assigned 67% (Chatham Rise) and 91% (Tasman Sea) to the location of origin.

Results from BAYESASS showed that contemporary migration between ocean basins is occasional and the direction is predominantly from the Pacific, with 3.8% of individuals migrating into the Atlantic, whereas only 1.9% of the migration occurs in the opposite direction.

GENELAND analyses recovered three major clusters corresponding to the following locations: (1) Pacific, (2) Atlantic, and (3) Great Meteor Bank (Material S4A). Great Meteor Bank has only 3 scored individuals with high proportion of missing data. Removing the individuals from this location from the dataset, only two clades were recovered corresponding to the Pacific and Atlantic locations (Material S4B).

### Divergence Time Estimates in *C. crepidater*

MULTIDIVTIME dating analysis based on the mitochondrial CR data set estimated the divergence between the two main clades at 14.95 [12–16.4] myr ago (Fig. 6). The age of the most recent common ancestor of clade I was estimated at 11.6 [8.6–14] myr, and of clade II at 10.5 [6.2–13.6] myr. The split between *C.*

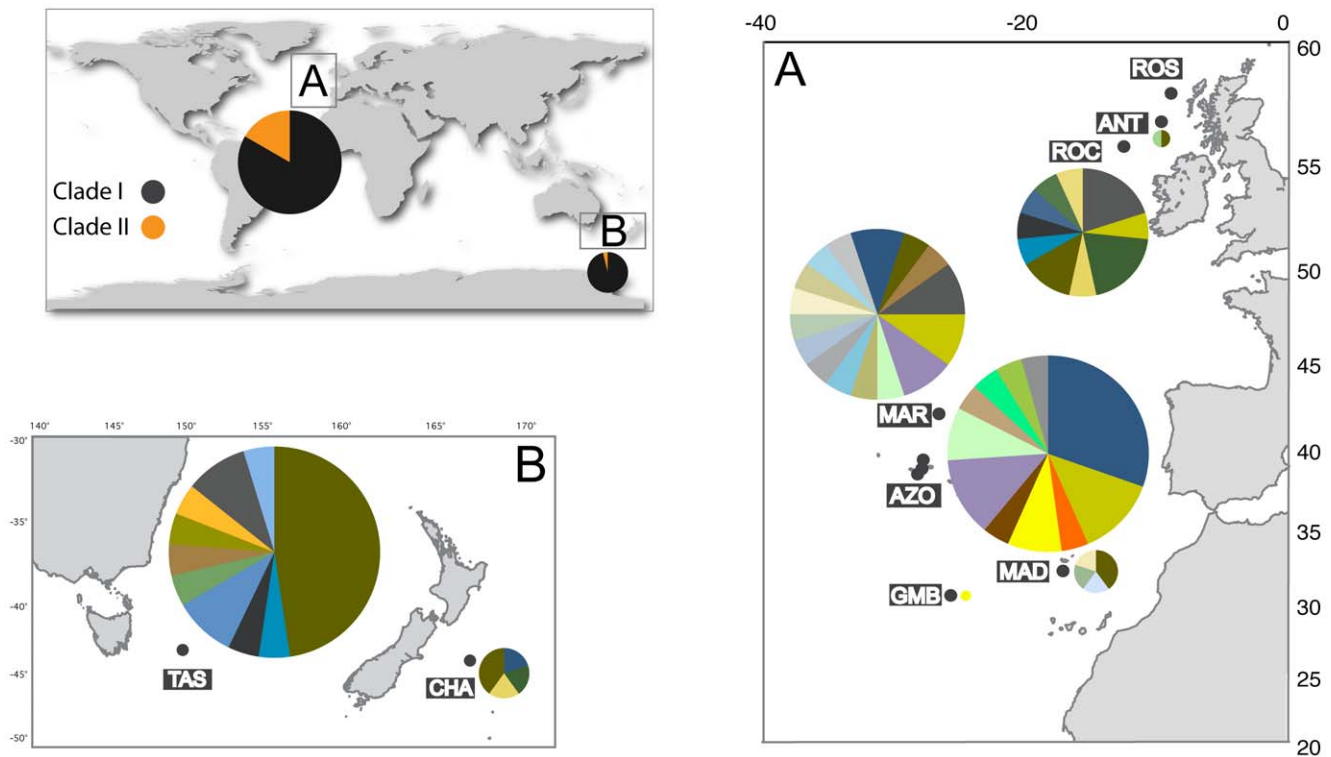

**Figure 1. Sampling locations of *Centroscymnus crepidater*.** Haplotype frequencies and clade proportions (Clade I, in black and Clade II, in orange) based on the CR mtDNA data set are also depicted. The size of each slice is proportional to the number of individuals sharing the same haplotype. The letters A and B refer to the Atlantic and Pacific sampling locations, respectively. Sampling location codes: ROS (Rosemary Bank); ANT (Anton Dohrn Seamount); ROC (Rockall Trough); MAR (Mid-Atlantic Ridge); AZO (Azores); MAD (Madeira); GMB (Great Meteor Bank); TAS (Tasman Sea), and CHA (Chatham Rise).

doi:10.1371/journal.pone.0049196.g001

*crepidater* and *Centroscymnus owstonii* was estimated at about 26 myr ago.

## Discussion

Phylogenetic analyses based on mtDNA recovered two deeply divergent clades (24 mutations apart) with an origin dating back to the Miocene. These genetic clades have different abundances (Clade I = 80 individuals, 87%; Clade II = 12 individuals, 13%) and are equally distributed between ocean basins (non-significant  $p$ -value of the two-tailed Fisher's exact test) without a discernible geographic pattern. In contrast, microsatellite data indicated a strong genetic differentiation between the Atlantic and Pacific Oceans.

Two main caveats must be addressed prior to interpreting these results. Data from the Pacific rely on fewer individuals from two locations and therefore we have a restricted representation of the genetic diversity of the region. We also have a limited number of microsatellite loci. Thirteen pairs of primers were initially developed for this species [27]. However, we were limited to use seven loci, as the remaining six pairs were monomorphic. In any case, the genetic assessment of a benthopelagic shark species is a contribution in itself, as genetic architecture of sharks, especially deep-water species, is notoriously less studied than their marine teleost counterpart.

## Taxonomic Status and Genetic Architecture of *C. crepidater*

The observed deep split of 24 mutations between the two main CR mtDNA clades (Fig. 2) suggests the existence of two different taxonomic entities. However, there is compelling evidence to conclude that specimens from both clades belong to the same species. First, sequence divergence between clades I and II ( $3.1\% \pm 0.61\%$ ) is much smaller when compared to the closely related species *Centroscymnus owstonii* and *Centroscymnus coelolepis*, used here as outgroups (17.9% and 18%, respectively). Second, the level of interspecific divergence in sharks is generally higher than in bony fishes (e.g. in six scalloped hammerhead shark species, sequence divergence ranged between 7.8 and 24.3% [15], and in seven angel sharks species ranged from 4.9 to 9.4% [12]). Finally, the overall mitochondrial sequence divergence in *C. crepidater* (1.0%) is similar to the value found in other shark species (e.g., in *Sphyrna lewini* is 1.3%; [15]).

*C. crepidater* exhibits diversities well within the range of other shark species. Values for haplotype diversity range from 0.28 to 0.97 and for nucleotide diversity from 0.0006 to 0.011, in lemon sharks [8] and whale sharks [28] respectively. Interestingly, the closely related Portuguese dogfish *Centroscymnus coelolepis* showed much lower haplotype and nucleotide diversities (0.65 and 0.002, respectively; [6]) than found in *C. crepidater*.

## Historical Divergence in *C. crepidater*

The origin of deep lineages showing no geographic correspondence, such as the two clades found within long-nosed velvet

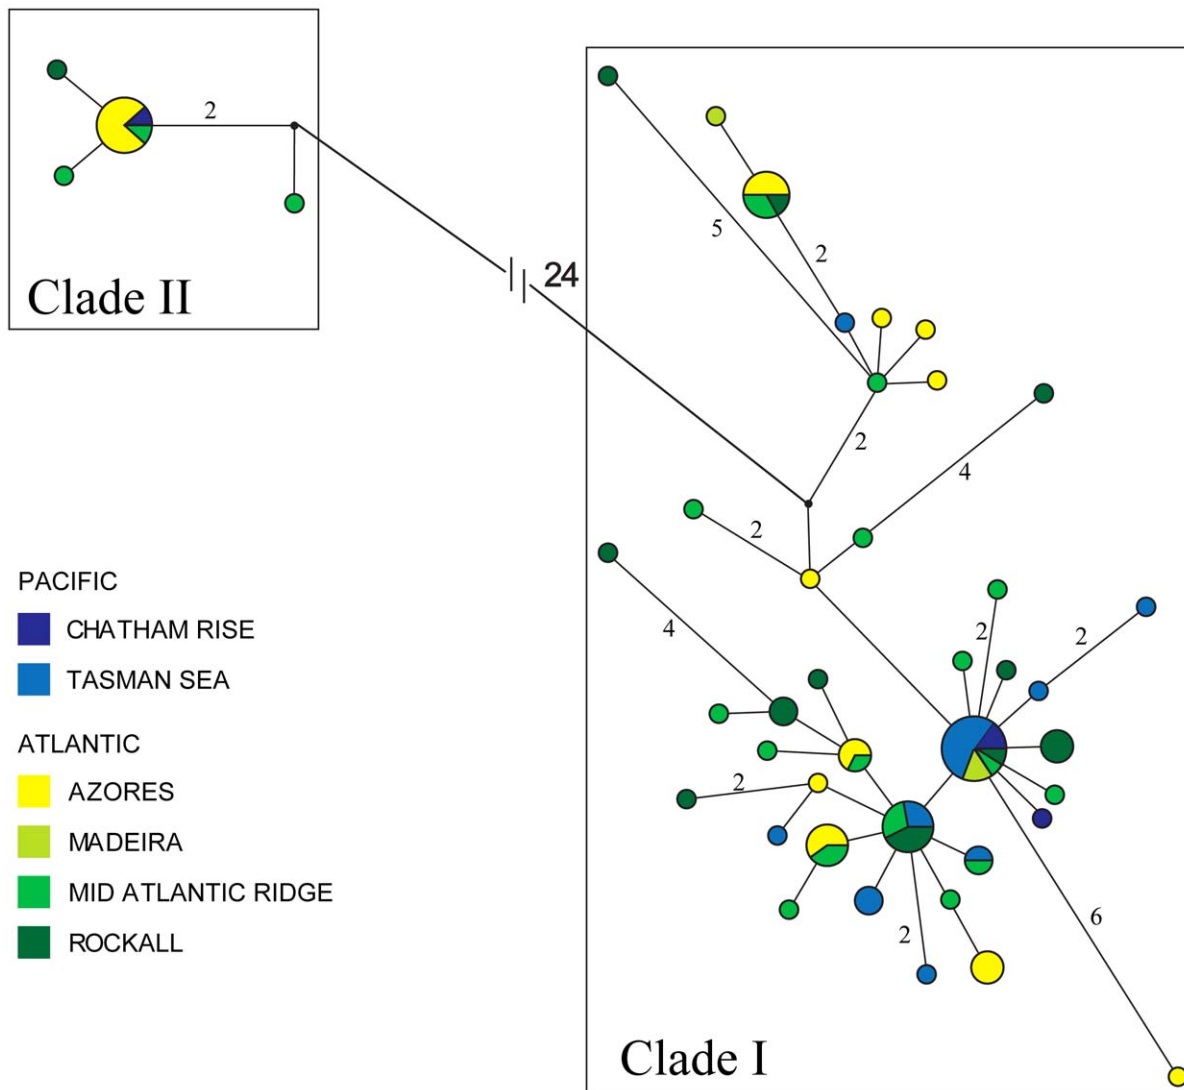

**Figure 2. Median-joining network of 45 mitochondrial control region haplotypes of *Centroscymnus crepidater*.** The area of each circle is proportional to the number of individuals sharing a particular haplotype. Colors refer to sample location, and the size of each slice is proportional to the number of individuals with that haplotype. Haplotypes are connected by branch lengths approximately equal to the inferred mutational steps. Numbers represent mutational steps. doi:10.1371/journal.pone.0049196.g002

dogfish, can result from two alternative scenarios: vicariance or lineage sorting in a large panmictic population.

**Vicariance scenario.** Bayesian dating analyses indicated an estimate for the divergence of *C. crepidater* into two mitochondrial clades at about 15 myr (Fig. 6). The fossil record of the genus *Centroscymnus* dates back to the Middle Miocene, and the current geographical distribution of the species include both the Atlantic, and Indo-Pacific basins. The Tethys corridor prevailed until ~17 myr ago with a final closure at 14 myr [14]. Thereby, we first hypothesized that the final closure of the Tethyan corridor could have triggered lineage-splitting events within *C. crepidater*.

Several studies proposed the Tethys vicariant hypothesis to explain the observed divergences between Atlantic and Indo-Pacific lineages (e.g. in lemon [8]; or angel [12]). Although the divergence of the two major *C. crepidater* mitochondrial clades occurred at the end of the closure of this seaway, the predicted outcome of this vicariant episode would be a sister relationship between the eastern Atlantic (one clade) and Indo-West Pacific

(another clade) populations. Instead, ML trees (Material S1 and S2) and Bayesian dating analysis (Fig. 6) showed specimens from the Atlantic and Pacific clustering together in one clade whereas the other is predominantly composed of Atlantic samples with a single specimen from the Chatham Rise.

The ML topologies (Material S1 and S2) seem to contradict the proposed hypothesis of divergence of *C. crepidater* driven by the closure of the Tethyan corridor. Nevertheless, this tectonic event could have played an indirect role on species diversification. The closure of this seaway ceased the influx of warm water into the northwestern Indian Ocean causing a significant oceanic cooling [29,30]. Moreover, the expansion of an Antarctic glaciation during the Middle Miocene (~17 myr ago) due to the development of a permanent East Antarctic ice sheet affected the Southern Ocean, also contributing to the observed cooling [31,32].

It is not expected that a marked drop in the deep-water temperature could significantly affect a widespread species occupying a wide range of latitudes such as *C. crepidater*. However,

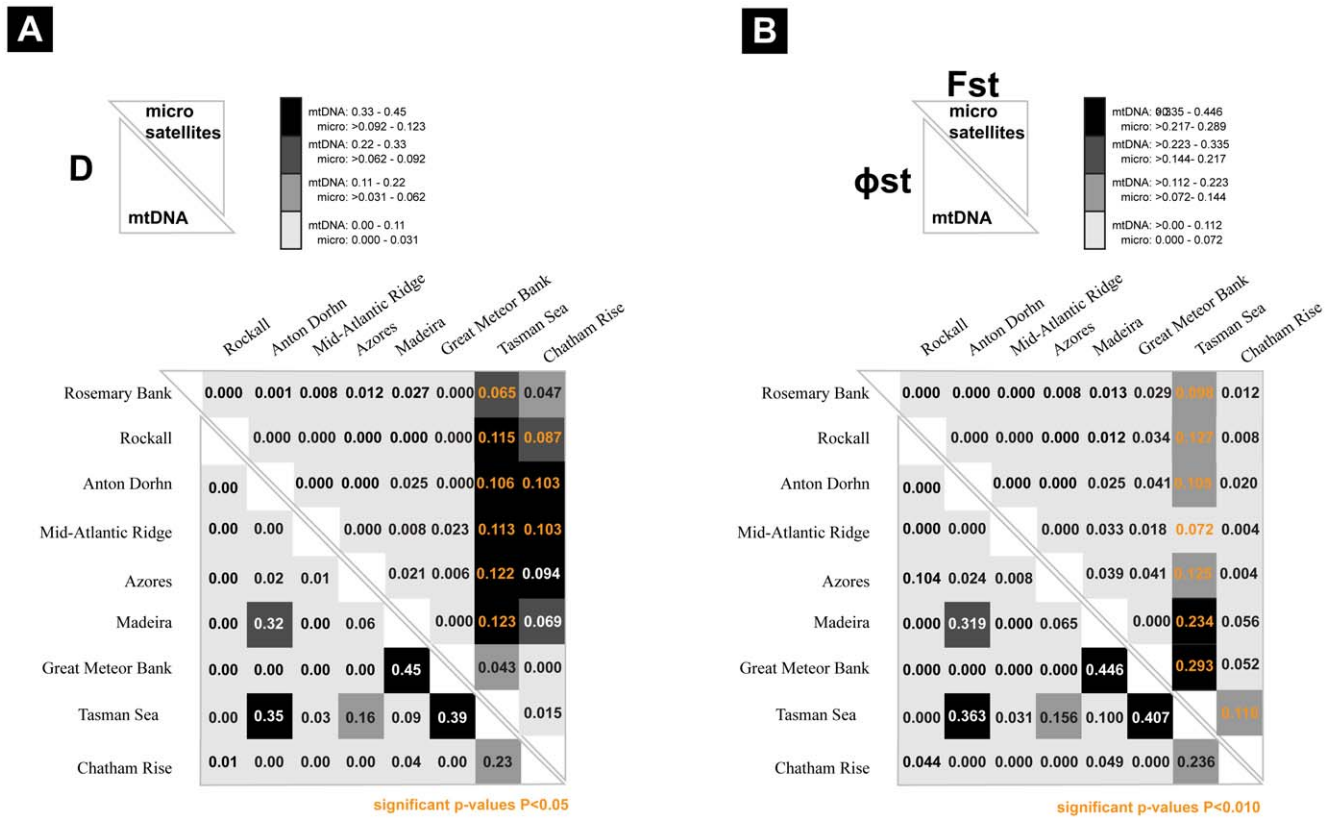

**Figure 3. Measures of genetic differentiation between geographic locations.** (A) Location pairwise D values for the mitochondrial (below diagonal) and microsatellite (above diagonal) data sets. (B) Location pairwise  $\Phi_{st}$  for the mitochondrial (below diagonal) and  $F_{st}$  for the microsatellite (above diagonal). The scale on the top of each figure indicates the correspondence between class intervals and colored boxes. Significant values after correction are depicted in orange. doi:10.1371/journal.pone.0049196.g003

this species feeds mostly on micronektonic organisms (fish and cephalopods) close to the seabed [33], and the oceanic cooling changed the structure of the benthic communities [34]. Fluctuations in the abundance of food resources might have led to the dispersal of *C. crepidater* throughout the northern Atlantic where

habitat conditions were more suitable during the Miocene [35], creating opportunities for lineage isolation. Ultimately, the cooling of the Southern Ocean might have had a vicariant effect by restricting gene flow between basins, which promoted an allopatric divergence of lineages. The well-supported monophyly of the two

**Table 1.** Genetic diversity for all *Centroscyrnus crepidater* sampled locations.

| Location           | Acronym | Mitochondrial DNA |    |                |                | Microsatellites |     |                |                |                |                 |     |
|--------------------|---------|-------------------|----|----------------|----------------|-----------------|-----|----------------|----------------|----------------|-----------------|-----|
|                    |         | N                 | NH | h (± s.d.)     | $\pi$ (± s.d.) | N               | A   | A <sub>R</sub> | H <sub>O</sub> | H <sub>E</sub> | G <sub>IS</sub> |     |
| Rosemary Bank      | ROS     | 0                 | -  | -              | -              | 26              | 4.9 | 3.2            | 0.522          | 0.481          | -0.085          | *   |
| Anton Dornh Bank   | DOR     | 2                 | 2  | 1.000 (±0.500) | 0.008 (±0.009) | 16              | 4.4 | 3.4            | 0.554          | 0.516          | -0.073          |     |
| Rockall Trough     | ROC     | 15                | 10 | 0.933 (±0.045) | 0.009 (±0.005) | 25              | 4.4 | 3.2            | 0.583          | 0.491          | <b>-0.187</b>   | *** |
| Mid-Atlantic Ridge | MAR     | 20                | 17 | 0.984 (±0.021) | 0.013 (±0.007) | 35              | 5.7 | 3.3            | 0.522          | 0.495          | -0.055          |     |
| Azores             | AZO     | 23                | 11 | 0.885 (±0.048) | 0.018 (±0.009) | 20              | 4.3 | 3.3            | 0.491          | 0.529          | 0.072           |     |
| Madeira            | MAD     | 5                 | 4  | 0.900 (±0.161) | 0.003 (±0.002) | 7               | 3.4 | 3.4            | 0.524          | 0.531          | 0.013           |     |
| Great Meteor Bank  | GMB     | 1                 | 1  | 0.000 (±0.000) | 0.000 (±0.000) | 3               | 3.2 | -              | 0.533          | 0.667          | 0.200           |     |
| Tasman Sea         | TAS     | 21                | 8  | 0.624 (±0.121) | 0.002 (±0.001) | 22              | 3.3 | 2.4            | 0.227          | 0.303          | 0.251           |     |
| Chatham Rise       | CHA     | 5                 | 4  | 0.900 (±0.161) | 0.014 (±0.017) | 6               | 2.9 | 2.9            | 0.381          | 0.426          | 0.106           |     |
| All                | -       | 92                | 45 | 0.946 (±0.013) | 0.011 (±0.006) | 160             | 7.4 | 3.3            | 0.481          | 0.485          | 0.009           | *   |

For mitochondrial CR sequence data: number of individuals (N), number of haplotypes (NH), haplotype diversity (h), nucleotide diversity ( $\pi$ ), and standard deviation (s.d.). For microsatellite data: number of individuals (N), mean number of alleles across loci (A), allelic richness (A<sub>R</sub>), observed (H<sub>O</sub>) and expected (H<sub>E</sub>) heterozygosities and heterozygote deficiency (G<sub>IS</sub>). Significance levels are indicated (\*p<0.05, \*\*\*p<0.001); values in bold indicate significance after q-value correction. doi:10.1371/journal.pone.0049196.t001

**Table 2.** *Centroscymnus crepidater*.

| Marker          | Group composition                                                                   | % variation | Fixation Index | <i>P</i>           |
|-----------------|-------------------------------------------------------------------------------------|-------------|----------------|--------------------|
| mtDNA           | Atlantic vs Pacific                                                                 |             |                |                    |
|                 | Between groups                                                                      | −1.12       | Φ CT =         | −0.011 0.510       |
|                 | Among locations within groups                                                       | 3.81        | Φ SC =         | 0.038 0.281        |
|                 | Within locations                                                                    | 97.31       | Φ ST =         | 0.027 0.238        |
|                 | Within Atlantic (one gene pool)                                                     |             |                |                    |
|                 | Among locations                                                                     | 1.19        |                |                    |
|                 | Within locations                                                                    | 98.81       | Φ ST =         | 0.010 0.348        |
|                 | Within Pacific (one gene pool)                                                      |             |                |                    |
|                 | Among locations                                                                     | 22.93       |                |                    |
|                 | Within locations                                                                    | 77.07       | Φ ST =         | 0.229 0.129        |
| Microsatellites | Between Atlantic and Pacific                                                        |             |                |                    |
|                 | Between groups                                                                      | 5.9         | FCT =          | 0.059 <b>0.000</b> |
|                 | Among locations within groups                                                       | 0.66        | FSC =          | 0.007 <b>0.011</b> |
|                 | Within locations                                                                    | 93.44       | FST =          | 0.066 <b>0.029</b> |
|                 | Within Atlantic (one gene pool)                                                     |             |                |                    |
|                 | Among locations                                                                     | 0.07        |                |                    |
|                 | Within locations                                                                    | 99.93       | FST =          | 0.001 0.119        |
|                 | Within Atlantic (2 gene pools): North (ROS, ANT, ROC) vs South (MAR, AZO, MAD, GMB) |             |                |                    |
|                 | Between groups                                                                      | −0.19       | FCT =          | −0.002 0.573       |
|                 | Among locations within groups                                                       | 0.19        | FSC =          | 0.002 0.121        |
|                 | Within locations                                                                    | 100.00      | FST =          | 0.000 0.113        |
|                 | Within Pacific (one gene pool)                                                      |             |                |                    |
|                 | Among locations                                                                     | 11.62       |                |                    |
|                 | Within locations                                                                    | 88.38       | FST =          | 0.116 <b>0.001</b> |

Analysis of molecular variance (AMOVA) of mtDNA control region sequence data and microsatellite data between and within ocean basins. Significant values in bold (see Table 1 for details on sampling locations).

doi:10.1371/journal.pone.0049196.t002

main lineages of *C. crepidater* (Fig. 6 and Material S1) further support an allopatric origin for the clades.

Two deeply divergent mtDNA clades were described in the bigeye tuna (*Thunnus obesus*) [36,37,38] with a spatial genetic structure similar to *C. crepidater*. One bigeye tuna clade was ubiquitously composed of Atlantic and Indo-Pacific samples while a second clade occurred almost entirely in the Atlantic. The lower water temperatures during the peak of glacial periods were proposed to restrict migration between ocean basins promoting divergence [37,38].

*Centroscymnus coelepis*, also a benthopelagic shark, does not exhibit any deep genetic break in its Atlantic range [6]. It would be expected that a species sharing with *C. crepidater* an identical geographic distribution and food regime, would be similarly affected by the oceanic cooling observed during the Miocene, and would also display a deep mtDNA divergence. Specimens of *C. crepidater* belonging to the clade II are rare (6.9%), and it is not unlikely that specimens of *C. coelepis* belonging to the putative second clade have not been sampled.

**Lineage sorting scenario.** The reticulated shape of clade I depicted in the network analysis (Fig. 2) suggests the existence of an old and stable population. Simulations show that large panmictic populations with a stable long history can produce deep mtDNA divergences simply by stochastic lineage sorting [39] as predicted by the coalescence theory [40].

It is difficult to ascertain the origin of a particular phylogeographic outcome because different biogeographical or stochastic events can result in similar population histories [39]. None of the proposed alternatives for the origin of the deep-divergent clades in this species can therefore be discarded. However, the most parsimonious explanation is the allopatric divergence due to a historical vicariant event promoted by the oceanic cooling observed during the Miocene in the Southern Ocean.

### Contemporary Differentiation and Female Philopatry in *C. crepidater*

Microsatellite *C. crepidater* data showed no significant differentiation among Atlantic locations and low levels of gene flow between the Atlantic and Pacific Oceans (Table 2). Estimated inter-oceanic contemporary migration rates were extremely low, in the order of only a few percentages of individuals (less than 4%). Also, estimates indicated that migration is asymmetrical with almost twice the number as many migrants moving from the Pacific towards the Atlantic, than in the opposite direction. Spatial structure revealed the existence of three clusters corresponding to the Atlantic, Pacific, and Great Meteor Bank sample locations (Material S4A). After removing the sample from the Great Meteor Bank (Great Meteor Bank has only 3 scored individuals with high proportion of missing data), the number of clusters included the Pacific and the Atlantic locations only (Material S4B), which is

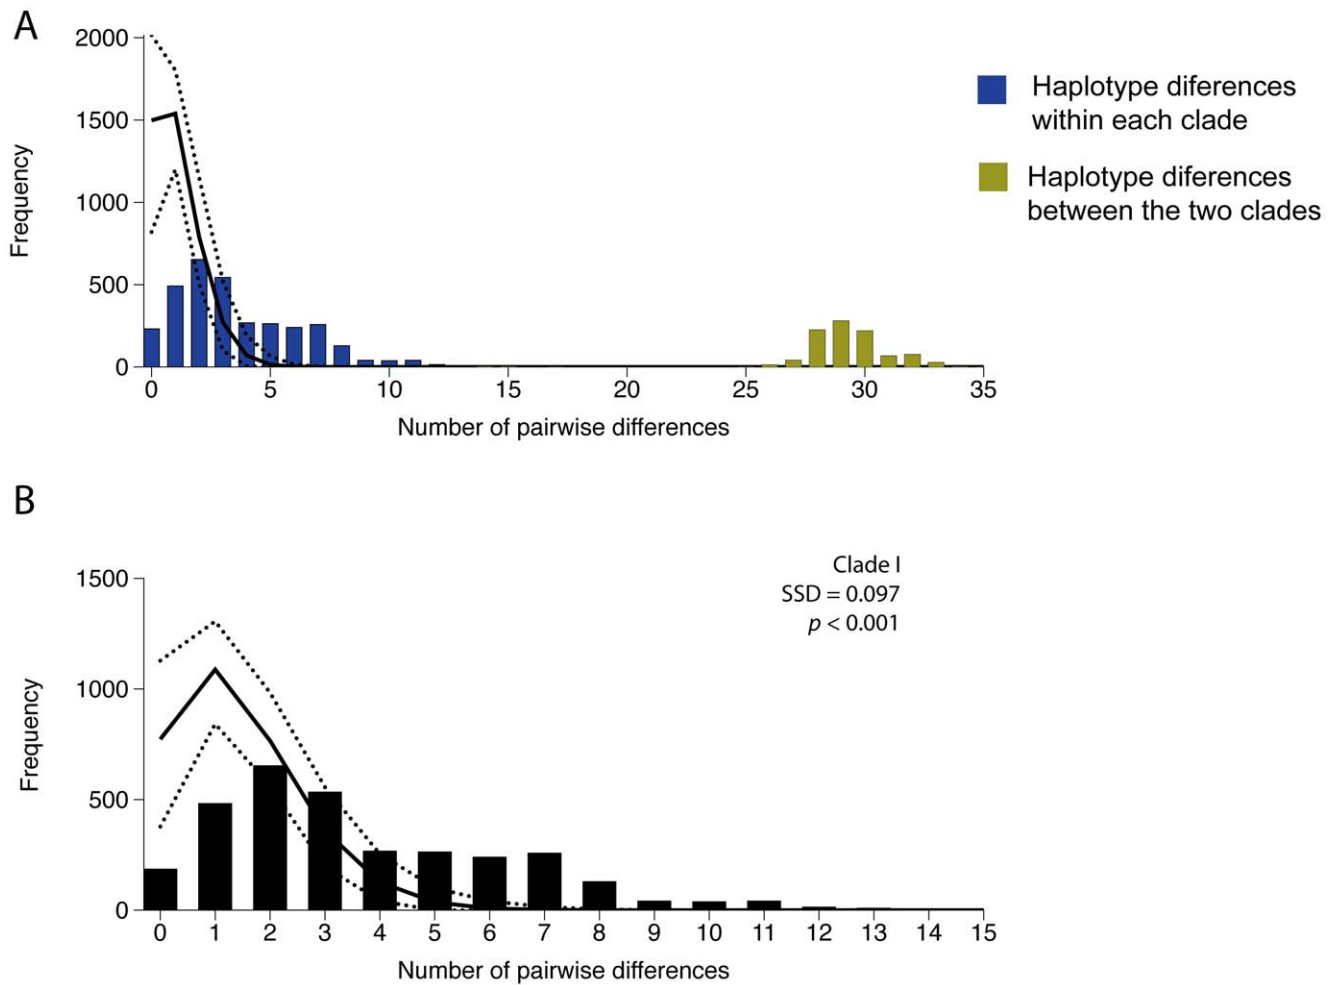

**Figure 4. Pairwise mismatch distributions using the CR mtDNA data set.** (A) mismatch distribution including all sequences; (B) mismatch distribution including sequences from Clade I only. Vertical bars represent observed frequencies. Upper and lower dashed lines represent the upper and lower 95% limits based on 10000 replicates in ARLEQUIN. Solid line represents the model (expected) frequency.  
doi:10.1371/journal.pone.0049196.g004

consistent with the existence of present-day barriers to gene flow between these ocean basins.

Nuclear genetic differentiation in marine organisms may have its inception in life-history traits (e.g. poor-dispersal capabilities at

**Table 3.** Summary statistics for seven microsatellite loci of Atlantic and Pacific samples of *Centroscymnus crepidater*: number of allele counts ( $N_C$ ), mean number of alleles across locations ( $N_A$ ), mean allelic richness standardized to sample size  $N = 6$ , excluding Great Meteor Bank sample ( $A_r$ ), effective number of alleles ( $E_{NA}$ ), observed heterozygosity ( $H_O$ ), heterozygosity within populations ( $H_S$ ), corrected total heterozygosity ( $H'_T$ ), and fixation index ( $G_{IS}$ ).

| Locus   | $N_C$ | $N_A$ | $A_r$ (N=6) | $E_{NA}$ | $H_O$ | $H_S$ | $H'_T$ | $G_{IS}$ |
|---------|-------|-------|-------------|----------|-------|-------|--------|----------|
| Ccre2   | 266   | 9     | 5.1         | 3.2      | 0.661 | 0.774 | 0.788  | 0.146    |
| Ccre11  | 316   | 5     | 2.5         | 1.4      | 0.319 | 0.275 | 0.286  | -0.159   |
| Ccre12  | 320   | 8     | 4.0         | 2.2      | 0.463 | 0.586 | 0.631  | 0.210    |
| Ccre13  | 310   | 9     | 5.1         | 4.6      | 0.715 | 0.829 | 0.819  | 0.138    |
| Ccre23  | 266   | 7     | 2.2         | 1.3      | 0.133 | 0.233 | 0.212  | 0.429    |
| Ccre27  | 320   | 11    | 2.1         | 1.3      | 0.258 | 0.253 | 0.273  | -0.021   |
| Ccre34  | 314   | 3     | 2.1         | 1.8      | 0.816 | 0.446 | 0.493  | -0.830   |
| Overall | NA    | 7.4   | 3.3         | 2.2      | 0.481 | 0.485 | 0.500  | 0.009    |

(NA, not applicable).

doi:10.1371/journal.pone.0049196.t003

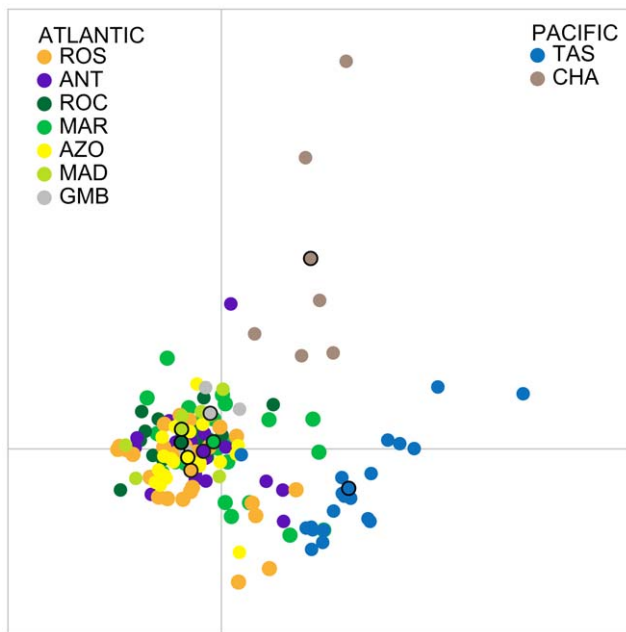

**Figure 5. Discriminant analysis of principle components (DAPC) of multi-locus genotype data for all populations.** Individual genotypes appear as circles, and black stroke circles represent the center of dispersion of each group. Populations are depicted in colors. X and Y axes are the first two principle components. doi:10.1371/journal.pone.0049196.g005

any stage of life) or in the presence of oceanic barriers [41]. The lack of a planktonic larval stage in *C. crepidater* implies that dispersal is mostly driven by juvenile or adult mobility and thus, affected to a lesser extent by the action of ocean currents. Benthopelagic species are not expected to exhibit long-range, inter-oceanic active dispersal [1]. However, ocean currents most likely influence the drifting of small fish and crustaceans that are part of the diet of *C. crepidater*.

At the interface between the Atlantic and the Indian Oceans, one of the main oceanographic current is the Agulhas Current (southward flowing) and its retroflexion formed by the turning back into the Indian Ocean [42,43]. Flowing patterns similar to those of today were established only at 5 myr ago [44]. The Agulhas Current retroflexion might therefore impact on *C. crepidater* present-day movements by creating a filter to the displacement of its prey between ocean basins. Coastal organisms such as intertidal mussels (*Perna perna*), exhibit distinct lineages around the South Africa coastline, which were attributed to a filter role of the Agulhas Current retroflexion [45].

Recent studies on sharks ascribed genetic differentiation to female philopatric behaviour (return to natal sites to breed; [2,46]). Female philopatry can constitute a reasonable explanation if mtDNA differentiation has a spatial component. Our mtDNA results however, show a deep genetic divergence with no geographic pattern (Table 2) and therefore, do not support the existence of female philopatry in *C. crepidater*. Moreover, results based either in mtDNA or microsatellites showed absence of genetic or geographic structure across putative preferential areas of homing behaviour such as submarine banks (e.g., Anton Dohrn or Rosemary Bank) that are usually used as breeding sites [11].

## Conclusions

Our survey of the deep-sea shark *Centroscyrmnus crepidater* indicates absence of genetic structure within the Atlantic but significant differentiation between Atlantic and Pacific populations using microsatellite data. Two deeply divergent mtDNA clades were recovered suggesting the occurrence of an allopatric historical event. Bayesian estimates dated this splitting during the Miocene at about 15 myr ago. To a certain extent, the final closure of the Tethys seaway during the Miocene may have been related with the observed lineage split because caused a decrease in water temperature and a subsequent turnover in the oceanic biota. Concomitantly, an Antarctic glaciation also promoted the oceanic cooling. Fluctuations in the food resources, together with the lower temperatures observed in the Southern Ocean during the Miocene, might have lead to the dispersal of *C. crepidater* throughout the northern Atlantic where habitat conditions were more suitable during the Miocene, promoting lineage divergence. We found no evidence of female philopatric behaviour in this species.

## Materials and Methods

### Ethics Statement

All samples from the Azores, Madeira, Mid-Atlantic Ridge (MAR), and Great Meteor Bank (MET) used in this study originated as by-catch from commercial fisheries and were collected by personnel at the Department of Oceanography and Fisheries from the Azores (DOP - <http://www.horta.uac.pt/>) aboard longliners. Permissions to join the commercial vessel crews were granted by the local Governments of Madeira and Azores for scientific purposes only. MAR and MET sampling locations are located in high seas, which means in legal terms, in areas beyond national jurisdiction, and no further permits are required. In regards of the killing, the majority of deep-sea sharks by the time they reach deck are already dead. For the specimens that were showing signs of life, they were released after a very quick and delicate handling to obtain info on length, weight and sex. Muscle tissue samples were collected from dead specimens.

Samples from Rockall Trough, Anton Dohrn, and Rosemary Bank were collected by research vessels run directly by the UK government through the Annual Survey by Marine Scotland: <http://www.scotland.gov.uk/Topics/marine/Sea-Fisheries> whose remit specifically entails the monitoring of the status of fish stocks in Scottish waters.

We obtained permits from CITES to import tissue samples from the Tasman Sea through the CSIRO - Marine and Atmospheric Research Institute (Tasmania, Australia). All 22 samples of *Centroscyrmnus crepidater* specimens from the Tasman Sea used in this study were originated from by-catch collected by Australian commercial fishing vessels using large demersal trawl nets. These vessels have Australian Government permission to conduct fishing operations within Australia's waters. The vessels were either targeting Orange Roughy (*Hoplostethus atlanticus*) or oreo dories (Smooth Oreo - *Pseudocyttus maculatus*, Spikey Oreo - *Neocyttus rhomboidalis* and Black Oreo - *Alloctytus niger*). The sharks would have been brought to surface (from depths of up to 1200 meters) dead amongst the large catch of either Orange Roughy and/or oreo dories. The tissues samples were taken from dead specimens. The specimens were later examined for various biological parameters (sex and development stage, diet and possibly age) by researchers from our divisional shark research team. Samples from the Chatham Rise (southern Pacific Ocean) were obtained through the Bavarian State Collection of Zoology DNA Bank.



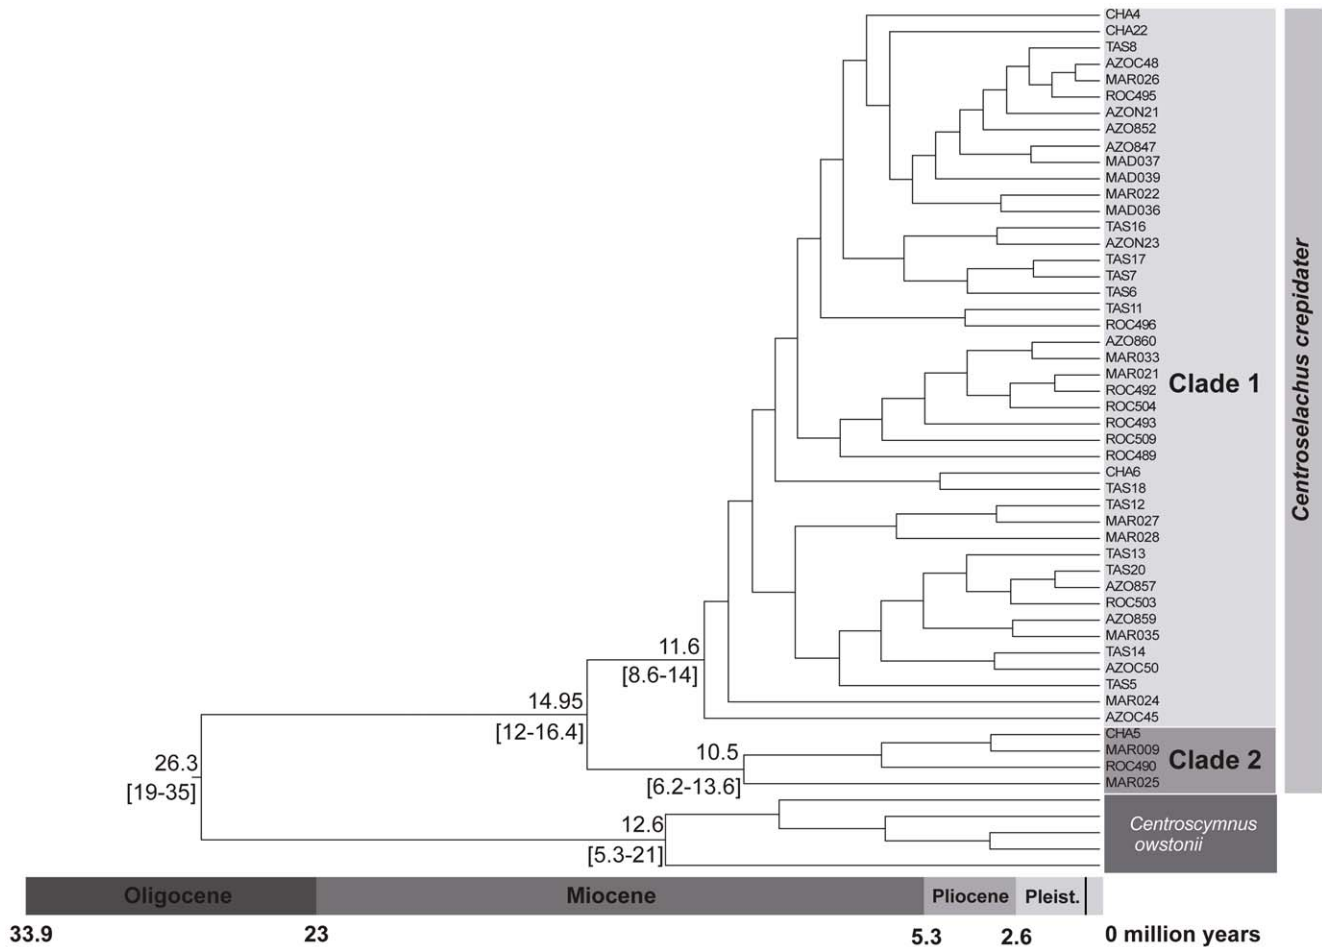

**Figure 6. Bayesian dating analysis based on the CR mtDNA data set obtained with MULTIDIVTIME.** Age estimates (in million years) of the main lineage splitting events within *Centroselachus crepidater* are depicted. Values in square brackets represent the 95% confidence intervals. Sample codes: ROC (Rockall Trough); MAR (Mid-Atlantic Ridge); AZO (Azores); MAD (Madeira); TAS (Tasman Sea), and CHA (Chatham Rise). doi:10.1371/journal.pone.0049196.g006

*Centroselachus crepidater* is NOT listed in the IUCN list of endangered/vulnerable/threatened species.

#### MtDNA and Microsatellites Laboratory Procedures

A total of 132 long-nosed velvet dogfish shark specimens (*Centroselachus crepidater*) were collected between 2003–2009 from seven locations in the Atlantic Ocean (Table 1). DNA was extracted from muscle tissue stored in absolute ethanol using either a standard salting-out protocol [47] or a phenol-chloroform extraction method followed by ethanol precipitation [48]. Primers ElasmCR15642 and ElasmCR16638 developed by [49] were used in polymerase chain reactions (PCRs) to amplify a portion of the mtDNA control region (CR) of *C. crepidater*. Despite using a range of extraction methods and primer combinations, we were only able to amplify 66 out of 132 Atlantic specimens collected using the above-mentioned primers. We amplified DNA of five individuals from the Chatham Rise and of 21 specimens from the Tasman Sea (see Table 1 and Fig. 1 for further details on sample locations). We also amplified a fragment of the cytochrome oxidase subunit I (COI) of a subset of *C. crepidater* samples from the Atlantic and the totality from the Pacific using universal primers from Folmer [50] to further analyse phylogenetic patterns. All phylogenetic analyses were performed for each marker independently, and we included COI for comparison purposes only.

All PCR amplifications were conducted in 25  $\mu$ l reactions containing 1X PCR buffer (*Buffer BD Advantage 2 PCR* with  $MgCl_2$ ), 0.2 mM of each dNTP, 0.2  $\mu$ M of each primer, 1  $\mu$ l of template DNA, and Taq DNA polymerase (1 unit, *Taq BD Advantage<sup>TM</sup> 2 Polymerase Mix*; CLONTECH-Takara). The following program was used for the PCR amplification: one cycle of 1 min at 95°C, 35 cycles of 30 s at 95°C, 30 s at 50°C (COI) or 52°C (CR), and 60 s (COI) or 70 s (CR) at 68°C, and finally, one cycle of 5 min at 68°C. PCR products were purified with an ethanol/sodium acetate precipitation, and directly sequenced using the corresponding PCR primers. Samples were sequenced in an automated DNA sequencer (ABI PRISM 3700) using the BigDye Deoxy Terminator cycle-sequencing kit (Applied Biosystems) following manufacturer's instructions.

Seven species-specific microsatellites (Ccrep02, Ccrep11, Ccrep12, Ccrep13, Ccrep23, Ccrep27 and Ccrep34) multiplexed in a single PCR reaction [27] were employed to analyse the genetic structure of Atlantic and Pacific populations of *C. crepidater* (132 specimens from the Atlantic Ocean and 28 from the Pacific Ocean). PCR amplifications were carried out using Qiagen Multiplex PCR kit in a final volume of 10  $\mu$ l containing 5  $\mu$ l of Multiplex Kit Buffer 2 $\times$  and 2.5 ng/ $\mu$ l of genomic DNA. Final primers' concentrations and fluorescent labels (Applied Biosystems) were as follows: Ccrep02 [NED] 0.45  $\mu$ M, Ccrep11 [PET]

0.15  $\mu$ M, Ccrep12 [6-FAM] 0.3  $\mu$ M, Ccrep13 [6-FAM] 0.2  $\mu$ M, Ccrep23 [VIC] 0.25  $\mu$ M, Ccrep27 [VIC] 0.1  $\mu$ M and Ccrep34 [NED] 0.15  $\mu$ M. Amplification started at 95°C for 15 min, followed by 35 cycles of 45 sec at 94°C, 45 sec at 59°C, 45 sec at 72°C, and a final extension step of 45 min at 72°C. PCR products were run alongside a GS600LIZ size standard (Applied Biosystems) in an ABI 3130xl Genetic Analyzer and alleles were scored using the program GENEMAPPER 4.0 (Applied Biosystems).

### Mitochondrial DNA Analyses

CR mtDNA sequences (*C. crepidater*: 66 from the Atlantic Ocean; 21 from the Tasman Sea; five from the Chatham Rise) were aligned with CLUSTALX [51] using the default settings. In the ML analysis of the CR mtDNA data set, we used five specimens of *Centroscyrmus ovestonii* (collected from two different locations, Azores and Mid-Atlantic Ridge) and one sequence of *Centroscyrmus coelelepis* (retrieved from the GenBank, HQ664449) as an outgroup, given the close phylogenetic relationship between these species [20]. COI mtDNA sequences of *C. crepidater* (24 from the Atlantic Ocean; 22 from the Tasman Sea; six from the Chatham Rise, and sequences available from the GenBank: DQ108233; DQ108234; GU130694) were also aligned with CLUSTALX. In the ML analysis based on the mtDNA COI data set, we used *Centroscyrmus coelelepis* as outgroup (DQ108219).

The Akaike information criterion [52] as implemented in MODELTEST v3.7 [53], selected the GTR+ $\Gamma$  ( $\Gamma = 0.37$ ) and the HKY+ $\Gamma$  ( $\Gamma = 0.19$ ) substitution models that best fit CR and COI data sets, respectively. These settings were used in maximum likelihood (ML) analyses performed with PHYML [54] using CR and COI data sets to assess if the reconstructed phylogenetic patterns using both fragments were congruent. We also used the CR ML tree as starting topology for the dating analysis. The robustness of the inferred trees was tested by nonparametric bootstrapping using 1000 pseudoreplicates.

We used the two-tailed Fisher's exact test because of the small sample size of clade II, to statistically evaluate the differences in geographical distribution of the two clades.

Haplotype ( $h$ ) and nucleotide ( $\pi$ ) diversities [55] were calculated using CR mtDNA sequence data with ARLEQUIN v3.5 [56]. We estimated the level of genetic variation between sample sites using Jost's  $D$  [57], which is more appropriate to estimate genetic differentiation between populations as it overcomes some of the limitations of conventional  $F$ -statistics [58,59]. Pairwise  $D$  and its statistical significance values, obtained by 1000 permutations [60], were estimated using R code. For completeness, we also provide  $\phi_{st}$  (mtDNA) values generated in ARLEQUIN to readily enable comparison with other studies given the widespread use of this statistic. Genetic diversity within and among populations was estimated with an analysis of molecular variance (AMOVA; [61]) in ARLEQUIN to test for differentiation between the two oceans (Pacific and Atlantic), and within each ocean basin. The significance of all  $\Phi$ -statistics was tested by 10,000 random permutations of sequences among populations.

Haplotype networks based on CR mtDNA data to depict relationships among haplotypes were performed with NETWORK v4.6 [62] available at fluxus-engineering.com). Median-joining networks [62] that contained all possible equally short trees were simplified by running the maximum parsimony calculation option to eliminate superfluous nodes and links [63].

Signatures of changes in population size can be detected in the pattern of pairwise differences among mitochondrial sequences [40]. We employed mismatch distributions to visualize signatures of population growth within the two distinct clades of haplotypes identified by the haplotype network. Frequencies of pair sequence

differences (mismatch distribution) form a smooth unimodal plot in populations that have undergone recent growth, but not in populations that have had stable sizes for long periods or have declined. Parameters were estimated in ARLEQUIN under the sudden expansion model (null model). The sudden expansion sum of squared deviation (deviation of simulated from observed – SSD) was calculated and tested against that expected under the sudden expansion model. We tested for deviations from neutral expectations using Fu's  $F_s$  [64] and Ramos-Onsins'  $R_2$  [65] statistics. These have been demonstrated to be the most powerful tests available for detecting population growth [65]. Tests of demographic expansion were conducted using DNASP and significance was evaluated by comparing the observed statistics to a distribution of values generated with 5000 coalescent simulations.

### Microsatellite Analyses: Genetic Diversity and Population Structure

We used genotype and allele frequencies of the microsatellite loci to obtain standard estimates of genetic diversity within and between sample sites. For each microsatellite locus and each location, genetic diversity was assessed with GENODIVE v2.0b22 [66] by determining the following parameters: (1) observed number of alleles ( $A$ ); (2) observed heterozygosity ( $H_O$ ); (3) expected heterozygosity ( $H_E$ ); (4) population gene diversity ( $H_S$ ), and (5) total corrected gene diversity ( $H_T$ ). Allelic richness ( $A_R$ ), a sample-size independent measure of the number of alleles, was estimated using FSTAT v2.9.3.2 [67]. Genetic structure between and within ocean basins was tested by AMOVA in ARLEQUIN using microsatellite data. We used the STANDRICH\_v1.00 [68], an R package to plot allelic frequencies for each location available at (<http://www.cmar.ualg.pt/maree/software.php?soft=sarich>).

We tested for signs of positive and balancing selection using the  $F_{st}$ -outlier approach [69,70] implemented in LOSITAN [71] as a precautionary way to evaluate the possible impact of selection on the genetic structure. Confidence intervals (99%) for neutral loci were determined using 10,000 simulations and also the recommended 'neutral mean  $F_{ST}$ ' option [71].

Deviations from the Hardy–Weinberg Equilibrium (HWE) were assessed with the GIS [55] and the Fis statistics from an AMOVA [61] in GENODIVE. Differentiation among samples was estimated using Jost's  $D$  [57] and calculations were carried out using the R package DEMETICS v. 0.8–5 [72]. The level of significance of Jost's  $D$  values was tested using 1,000 bootstraps. For completeness, we also provide  $F_{st}$  (microsatellites) values and their statistic significance to readily enable comparison with other studies given the widespread use of this statistic.

Discriminate Analysis of Principle Components (DAPC) [73] as implemented the package ADEGENET [74] in R 2.12.1 (R Development Core Team 2010) was performed on multi-locus genotype data for all sampled locations. This method transforms data using principle component analysis (PCA) to create uncorrelated variables for input into Discriminant Analysis (DA). DA maximizes between-group variation and minimizes within-group variation for assessment of population structure. DAPC is free of assumptions about Hardy–Weinberg equilibrium or linkage disequilibrium and provides graphical representation of divergence among populations. The function *find.clust* was employed to investigate genetic structure by running successive  $k$ -means, using the Bayesian Information Criterion (BIC) and  $10^7$  iterations. The optimal  $k$  is usually associated with the lowest BIC value. In cases of continuously decreasing BIC, the optimal  $k$  could be selected by visually investigating the rate of decrease [73].

When appropriate, significance levels of all multiple statistical tests were corrected using the false discovery rate (FDR) approach [75,76] implemented in R using the *QVALUE* package [77].

Contemporary direction and rate of migration was estimated by a Bayesian method based on multi-locus genotypes implemented in *BAYESASS* [78], by pooling all locations into two groups corresponding to the Atlantic and Pacific Oceans. The method does not assume that populations are at genetic equilibrium or that genotypes are in accord with Hardy-Weinberg equilibrium, but the loci in the parent populations are assumed to be in linkage equilibrium. The method is based on MCMC methods to estimate the posterior probabilities of the migration matrix among sub-populations [78]. Convergence was achieved after  $6 \times 10^6$  MCMC iterations and a burn-in of  $2 \times 10^6$  steps. The data was run three times to check for consistency of results, and their values were averaged.

Spatial structure was assessed with a Bayesian clustering algorithm to determine the most probable number of genetic clusters present within the dataset without prior knowledge of the individuals' origin. This method of population assignment was analyzed using the R package *GENELAND* version 2.0 [79] producing a map that consolidated genetic and geographic data. The program makes use of a geographically constrained Bayesian model that explicitly takes into account the spatial position of sampled multilocus genotypes without any prior information on the number of populations and degree of differentiation between them. To determine the number of genetic clusters independent runs were implemented using 1,000,000 MCMC iterations with a burn in period of 100 and a thinning value of 1,000. The value of *K* was set from 1 to 9 clusters on a correlated frequency model. We inferred the number of clusters from the modal value of *K* with the highest posterior probability. *GENELAND* is able to detect subtle geographic structure by combining geographic data into the analysis as a weak prior. This follows the assumption that each population exhibits some degree of spatial structure; however, individuals can belong to multiple populations for posterior likelihood testing [79].

### Divergence Time Estimates in *C. crepidater*

Prior to the analysis, identical haplotypes from the mtDNA CR data set were collapsed with the program *COLLAPSE* version 1.2 [80]. In order to date lineage-splitting events within *C. crepidater*, we used *MULTIDIVTIME* [81,82] a Bayesian relaxed molecular-clock approach that incorporates variation of rates of evolution among lineages. We followed the procedure outlined in Rutschmann 2005 [83], using the CR ML tree reconstructed in *PHYML* as a starting phylogeny. Two calibration points were set according to the fossil record. The first calibration was based on the minimum age of the family Somniosidae [19,84] in which all analysed taxa are included. We imposed an upper bound of 83.5 myr and a lower bound of 70.6 myr (boundaries of the Campanian from the Upper Cretaceous) corresponding to the minimum age of the family. The second calibration was based on the only fossils shark teeth unambiguously assigned to the genus *Centroscyminus* from the Middle Miocene of Japan [21]. We imposed an upper bound of 16.4 myr and a lower bound of 11.2 myr (boundaries of the

Middle Miocene) corresponding to the minimum age of the genus. The parameter *rrate* was set to 0.014 (mean of the prior distribution for the rate at the ingroup root node) and the standard deviation was set to its maximum value (equal to the mean). The MCMC method was employed to approximate both prior and posterior distributions [82] with an initial burn-in period of 100,000 cycles. Markov chain was sampled every 100 cycles until a total of 10,000 samples were collected.

### Supporting Information

**Material S1 Phylogenetic relationships within *Centroscyminus crepidater* based on a maximum likelihood analysis of an 868 bp fragment of the mitochondrial control region.** Numbers above and below nodes correspond to ML bootstrap proportions and Bayesian posterior probabilities, respectively.

(EPS)

**Material S2 Phylogenetic relationships within *Centroscyminus crepidater* based on a maximum likelihood analysis of a 655 bp fragment of the mitochondrial cytochrome oxidase subunit I.** Numbers above and below nodes correspond to ML bootstrap proportions and Bayesian posterior probabilities, respectively.

(EPS)

**Material S3 Allele distributions.** Distribution of the alleles found for each locus at the different sites sampled. Note that not all alleles are represented numerically underneath the respective plot. However, the allelic distribution is represented in the graphs for all alleles.

(TIF)

**Material S4 Posterior density distribution of the number of clusters estimated from *GENELAND* analysis. A.** Including the Great Meteor Bank sample. **B.** Excluding the Great Meteor Bank sample.

(TIF)

### Acknowledgments

We are very grateful to Alastair Graham and Bob Ward from the CSIRO - Marine and Atmospheric Research (Tasmania, Australia) for providing samples from the Tasman Sea. We are also very grateful to Ana Zúquete from ICNB, Institute for Nature Conservation and Biodiversity (Portugal) for helping us with the legal procedure to obtain the samples from Australia. We also thank Nicolas Straube for helping us in obtaining DNA samples from the Chatham Rise (New Zealand) through the Bavarian State Collection of Zoology DNA Bank. We thank Pleuni Pennings (Harvard University) for providing the R code to estimate significance values for *D*. Three anonymous reviewers provided insightful comments on a previous version of the manuscript.

### Author Contributions

Conceived and designed the experiments: RLC RC SM IC SS. Performed the experiments: RLC CM IC RC. Analyzed the data: RLC RC IC. Contributed reagents/materials/analysis tools: RC IC SS SM. Wrote the paper: RLC RC SM.

### References

- Musick JA, Harbin MM, Compagno IJV (2004) Historical zoogeography of the Selachii. In: Carrier JC, Musick JA, Heithaus MR, editors. *Biology of Sharks and Their Relatives*. Boca Raton, Florida. 33–78.
- Keeney DB, Heupel MR, Hueter RE, Heist EJ (2005) Microsatellite and mitochondrial DNA analyses of the genetic structure of blacktip shark (*Carcharhinus limbatus*) nurseries in the northwestern Atlantic, Gulf of Mexico, and Caribbean Sea. *Molecular Ecology* 14: 1911–1923.
- Keeney DB, Heist EJ (2006) Worldwide phylogeography of the blacktip shark (*Carcharhinus limbatus*) inferred from mitochondrial DNA reveals isolation of western Atlantic populations coupled with recent Pacific dispersal. *Molecular Ecology* 15: 3669–3679.
- Rus Hoelzel A, Shivji MS, Magnussen J, Francis MP (2006) Low worldwide genetic diversity in the basking shark (*Cetorhinus maximus*). *Biology Letters* 2: 639.

5. Pereyra S, García G, Miller P, Oviedo S, Domingo A (2010) Low genetic diversity and population structure of the narrownose shark (*Mustelus schmitti*). *Fisheries Research* 106: 468–473.
6. Verissimo A, McDowell JR, Graves JE (2011) Population structure of a deep-water squaloid shark, the Portuguese dogfish (*Centroscyminus coelelepis*). *ICES Journal of Marine Science: Journal du Conseil* 68: 555.
7. White TA, Stefanni S, Stamford J, Rus Hoelzel A (2009) Unexpected panmixia in a long-lived, deep-sea fish with well-defined spawning habitat and relatively low fecundity. *Molecular Ecology* 18: 2563–2573.
8. Schultz JK, Feldheim KA, Gruber SH, Ashley MV, McGovern TM, et al. (2008) Global phylogeography and seascape genetics of the lemon sharks (genus *Negaprion*). *Molecular Ecology* 17: 5336–5348.
9. Pardini AT, Jones CS, Noble LR, Kreiser B, Malcolm H, et al. (2001) Sex-biased dispersal of great white sharks. *Nature* 412: 139–140.
10. Feldheim KA, Gruber SH, Ashley MV (2001) Population genetic structure of the lemon shark (*Negaprion brevirostris*) in the western Atlantic: DNA microsatellite variation. *Molecular Ecology* 10: 295–303.
11. Hueter RE (1998) Philopatry, natal homing and localized stock depletion in sharks. *Shark News* 12: 1–2.
12. Stelbrink B, Von Rintelen T, Cliff G, Kriwet J (2010) Molecular systematics and global phylogeography of angel sharks (genus *Squatina*). *Molecular phylogenetics and evolution* 54: 395–404.
13. Ricou LE (1987) The Tethyan oceanic gates: a tectonic approach to major sedimentary changes within Tethys. *Geodynamica Acta*: 225–232.
14. Woodruff F, Savin SM (1989) Miocene deepwater oceanography. *Paleoceanography* 4: 87–140.
15. Duncan KM, Martin AP, Bowen BW, De Couet HG (2006) Global phylogeography of the scalloped hammerhead shark (*Sphyrna lewini*). *Molecular Ecology* 15: 2239–2251.
16. Irvine SB, Stevens JD, Laurensen LJ (2006) Surface bands on deepwater squalid dorsal-fin spines: an alternative method for ageing *Centroscyllium crepidater*. *Canadian journal of fisheries and aquatic sciences* 63: 617–627.
17. Last PR, Stevens JD (1994) *Sharks and rays of Australia*; CSIRO, editor. Australia.
18. Slatkin M (1993) Isolation by distance in equilibrium and nonequilibrium populations. *Evolution* 47: 264–279.
19. Thies D, Müller A (1993) A neoselachian fauna (Vertebrata, Pisces) from the Late Cretaceous (Campanian) of Höver, near Hannover (NW, Germany). *Paläontologische Zeitschrift* 67: 89–107.
20. Klug S, Kriwet J (2010) Timing of deep sea adaptation in dogfish sharks: insights from a supertree of extinct and extant taxa. *Zoologica Scripta* 39: 331–342.
21. Suzuki H (2008) Squaliform shark teeth of the genus *Centroscyllium* from the Miocene of Japan. *Journal of the Geological Society of Japan* 114: 536–539.
22. Avise JC (1994) *Molecular markers, natural history and evolution*. New York: Chapman & Hall. 541 p.
23. Sunnucks P (2000) Efficient genetic markers for population biology. *Trends in Ecology & Evolution* 15: 199–203.
24. Schmidt JV, Schmidt CL, Ozer F, Ernst RE, Feldheim KA, et al. (2009) Low Genetic Differentiation across Three Major Ocean Populations of the Whale Shark, *Rhincodon typus*. *PLoS ONE* 4: e4988.
25. Meyer CP (2003) Molecular systematics of cowries (Gastropoda: Cypraeidae) and diversification patterns in the tropics. *Biological Journal of the Linnean Society* 79: 401–459.
26. Williams ST, Reid DG (2004) Speciation and diversity on tropical rocky shores: a global phylogeny of snails of the genus *Echinolittorina*. *Evolution* 58: 2227–2251.
27. Helyar S, Coscia I, Sala-Bozano M, Mariani S (2011) New microsatellite loci for the longnose velvet dogfish *Centroscyllium crepidater* (Squaliformes: Somniosidae) and other deep sea sharks. *Conservation Genetics Resources* 3: 173–176.
28. Castro ALF, Stewart BS, Wilson SG, Hueter RE, Meekan MG, et al. (2007) Population genetic structure of Earth's largest fish, the whale shark (*Rhincodon typus*). *Molecular Ecology* 16: 5183–5192.
29. Smart CW, Thomas E (2007) Emendation of the genus *Streptochilus* Brönnimann and Resig 1971 (Foraminifera) and new species from the lower Miocene of the Atlantic and Indian Oceans. *Micropaleontology* 53: 73–103.
30. Allen MB, Armstrong HA (2008) Arabia-Eurasia collision and the forcing of mid-Cenozoic global cooling. *Palaeogeography, Palaeoclimatology, Palaeoecology* 265: 52–58.
31. Thunell R, Belyea P (1982) Neogene Planktonic Foraminiferal Biogeography of the Atlantic Ocean. *Micropaleontology* 28: 381–398.
32. Pagani M, Arthur MA, Freeman KH (1999) The Miocene evolution of atmospheric carbon dioxide. *Paleoceanography* 14: 273–292.
33. Mauchline J, Gordon JDM (1983) Diets of the sharks and chimaeroids of the Rockall Trough, northeastern Atlantic Ocean. *Marine Biology* 75: 269–278.
34. Aronson RB, Blake DB (2001) Global climate change and the origin of modern benthic communities in Antarctica. *American Zoologist* 41: 27.
35. McNeil DH (1990) Tertiary marine events of the Beaufort-Mackenzie Basin and correlation of Oligocene to Pliocene marine outcrops in Arctic North America. *Arctic* 43: 301–313.
36. Alvarado Bremer JR, Steuert B, Robertson NW, Ely B (1998) Genetic evidence for inter-oceanic subdivision of bigeye tuna (*Thunnus obesus*) populations. *Marine Biology* 132: 547–557.
37. Martínez P, González EG, Castillo R, Zardoya R (2006) Genetic diversity and historical demography of Atlantic bigeye tuna (*Thunnus obesus*). *Molecular Phylogenetics and Evolution* 39: 404–416.
38. Gonzalez E, Beerli P, Zardoya R (2008) Genetic structuring and migration patterns of Atlantic bigeye tuna, *Thunnus obesus* (Lowe, 1839). *BMC Evolutionary Biology* 8: 252.
39. Grant SW, Liu M, Gao TX, Yanagimoto T (2012) Limits of Bayesian skyline plot analysis of mtDNA sequences to infer historical demographies in Pacific herring (and other species). *Molecular Phylogenetics and Evolution*.
40. Rogers AR, Harpending H (1992) Population growth makes waves in the distribution of pairwise genetic distances. *Molecular Biology and Evolution* 9: 552–569.
41. Waples R (1998) Separating the wheat from the chaff: patterns of genetic differentiation in high gene flow species. *Journal of Heredity* 89: 438–450.
42. Ivanova EV (2009) *The Global Thermohaline Paleocirculation*. New York: Springer. 314 p.
43. Lutjeharms JRE (2006) The coastal oceans of south-eastern Africa. In: Brink ARRaKH, editor. *The global coastal ocean: the sea - ideas and observations on the progress in the study of the seas* Harvard University Press. 783–834.
44. Martin A (1981) Evolution of the Agulhas Current and its palaeo-ecological implications. *South African Journal of Science* 77: 547–554.
45. Zardi G, Nicastro K, McQuaid C, Hancke L, Helmuth B (2011) The combination of selection and dispersal helps explain genetic structure in intertidal mussels. *Oecologia* 165: 947–958.
46. Schrey AW, Heist EJ (2003) Microsatellite analysis of population structure in the shortfin mako (*Isurus paucus*). *Canadian Journal of Fisheries and Aquatic Sciences* 60: 670–675.
47. Miller SA, Dykes DD, Polesky HF (1988) A simple salting out procedure for extracting DNA from human nucleated cells. *Nucleic acids research* 16: 1215.
48. Kocher TD, Thomas WK, Meyer A, Paabo S, Villablanca FX, et al. (1989) Dynamics of mitochondrial DNA evolution in animals: Amplification and sequencing with conserved primers. *PNAS* 86: 6196–6200.
49. Stonero DS, Grady JM, Priede KA, Quattro JM (2003) Amplification primers for the mitochondrial control region and sixth intron of the nuclear-encoded lactate dehydrogenase A gene in elasmobranch fishes. *Conservation Genetics* 4: 805–808.
50. Folmer O, Black M, Hoeh W, Lutz R, Vrijenhoek R (1994) DNA primers for amplification of mitochondrial cytochrome c oxidase subunit I from diverse metazoan invertebrates. *Molecular Marine Biology and Biotechnol* 3: 294–297.
51. Thompson JD, Gibson TJ, Plewniak F, Jeanmougin J, Higgins DG (1997) The Clustal X windows interface: Flexible strategies for multiple sequence alignment aided by quality analysis tools. *Nucleic Acids Research* 25: 4876–4882.
52. Akaike H (1973) Information theory as an extension of the maximum likelihood principle. In: Csaki BNPaF, editor. *2nd International Symposium on Information Theory*. Budapest, Hungary: Akademiai Kiado. pp. Pp. 267–281.
53. Posada D, Crandall ED (1998) Modeltest: testing the model of DNA substitution. *Bioinformatics* 14: 817–818.
54. Guindon S, Gascuel O (2003) A simple, fast and accurate algorithm to estimate large phylogenies by maximum likelihood. *Systematic Biology* 52: 696–704.
55. Nei M (1987) *Molecular Evolutionary Genetics*; Press CU, editor. New York.
56. Excoffier L, Lischer HEL (2010) Arlequin suite ver 3.5: A new series of programs to perform population genetics analyses under Linux and Windows. *Molecular Ecology Resources* 10: 564–567.
57. Jost L (2008) G (ST) and its relatives do not measure differentiation. *Molecular Ecology* 17: 4015.
58. Gerlach G, Jueterbock A, Kraemer P, Deppermann J, Harmand P (2010) Calculations of population differentiation based on GST and D: forget GST but not all of statistics! *Molecular Ecology* 19: 3845–3852.
59. Whitlock M (2011) G\*ST and D do not replace FST. *Molecular Ecology* 20: 1083.
60. Pennings P, Achenbach A, Foitzik S (2011) Similar evolutionary potentials in an obligate ant parasite and its two host species. *Journal of Evolutionary Biology* 24: 871–886.
61. Excoffier L, Smouse PE, Quattro JM (1992) Analysis of molecular variance inferred from metric distances among DNA haplotypes: application to human mitochondrial DNA restriction data. *Genetics* 131: 479–491.
62. Bandelt HJ, Forster P, Rohl A (1999) Median-joining networks for inferring intraspecific phylogenies. *Molecular Biology and Evolution* 16: 37–48.
63. Polzin T, Daneschmand SV (2003) On Steiner trees and minimum spanning trees in hypergraphs. *Operations Research Letters* 31: 12–20.
64. Fu Y (1997) Statistical tests of neutrality of mutations against population growth, hitchhiking and background selection. *Genetics* 147: 915–925.
65. Ramos-Onsins R, Rozas R (2002) Statistical properties of new neutrality tests against population growth. *Molecular Biology and Evolution* 19: 2092–2100.
66. Meirans PG, Van Tienderen PH (2004) GENOTYPE and GENODIVE: two programs for the analysis of genetic diversity of asexual organisms. *Molecular Ecology Notes* 4: 792–794.
67. Goudet J (2001) FSTAT, a Program to Estimate and Test Gene Diversities and Fixation Indices Version 2.9.3.
68. Alberto F (2006) standArich\_v1.00: an R package to estimate population allelic richness using standardized sample size. CCMAR, University of Algarve, Portugal.
69. Beaumont MA, Nichols RA (1996) Evaluating loci for use in the genetic analysis of population structure. *Proceedings: Biological Sciences* 263: 1619–1626.
70. Beaumont MA (2005) Adaptation and speciation: what can tell us? *Trends in Ecology and Evolution* 20: 435–440.

71. Antão T, Lopes A, Lopes R, Beja-Pereira A, Luikart G (2008) LOSITAN: A workbench to detect molecular adaptation based on a Fst-outlier method. *BMC Bioinformatics* 9: 323.
72. Gerlach G, Atema J, Kingsford MJ, Black KP, Miller-Sims V (2007) Smelling home can prevent dispersal of reef fish larvae. *PNAS* 104: 858–863.
73. Jombart T, Devillard S, Balloux F (2010) Discriminant analysis of principal components: a new method for the analysis of genetically structured populations. *BMC Genetics* 11: 94.
74. Jombart T (2008) adegenet: a R package for the multivariate analysis of genetic markers. *Bioinformatics* 24: 1403–1405.
75. Benjamini Y, Hochberg Y (1995) Controlling the false discovery rate: a practical and powerful approach to multiple testing. *Journal of the Royal Statistical Society Series B (Methodological)* 57: 289–300.
76. Benjamini Y, Yekutieli D (2001) The control of the false discovery rate in multiple testing under dependency. *Annals of statistics* 29: 1165–1188.
77. Dabney A, Storey J, Warnes G (2006) qvalue: Q-value estimation for false discovery rate control. R package version 1.
78. Wilson GA, Rannala B (2003) Bayesian inference of recent migration rates using multilocus genotypes. *Genetics* 163: 1177–1191.
79. Guillot G, Mortier F, Estoup A (2005) Geneland: a computer package for landscape genetics. *Molecular Ecology Notes* 5: 712–715.
80. Posada D (2004) COLLAPSE 1.2. Available at: <http://darwin.uvigo.es/software/collapse.html>. 1.2 ed.
81. Thorne JL, Kishino H, Painter IS (1998) Estimating the rate of evolution of the rate of molecular evolution. *Molecular Biology and Evolution* 15: 1647–1657.
82. Kishino H, Thorne JL, Bruno WJ (2001) Performance of a divergence time estimation method under a probabilistic model of rate evolution. *Molecular Biology and Evolution* 18: 352–361.
83. Rutschmann F (2005) Bayesian molecular dating using paml/multidivtime. A step-by-step manual. Available in: <http://www.plantch/>. Zurich, Switzerland: Institute of Systematic Botany, University of Zurich.
84. Adnet S, Capetta H (2001) A palaeontological and phylogenetical analysis of squaliform sharks (Chondrichthyes: Squaliformes) based on dental characters. *Lethaia* 34: 234–248.
